# Supplementary material for: Effects of the CO2 Guest Molecule on the sI Clathrate Hydrate Structure
Source: Materials (Basel). 2016 Sep 15;9(9):777. doi: 10.3390/ma9090777 (PMC5457105; doi:10.3390/ma9090777)
Supplement: Supplementary file 1 [file materials-09-00777-s001.cif]

#======================================================================

# CRYSTAL DATA

#----------------------------------------------------------------------

sI_clathrate_structure_with_co2


_pd_phase_name                         'XCrySDen XSF file'
_cell_length_a                         11.64189
_cell_length_b                         11.64189
_cell_length_c                         11.64189
_cell_angle_alpha                      90
_cell_angle_beta                       90
_cell_angle_gamma                      90
_symmetry_space_group_name_H-M         'P 1'
_symmetry_Int_Tables_number            1

loop_
_symmetry_equiv_pos_as_xyz
   'x, y, z'

loop_
   _atom_site_label
   _atom_site_occupancy
   _atom_site_fract_x
   _atom_site_fract_y
   _atom_site_fract_z
   _atom_site_adp_type
   _atom_site_B_iso_or_equiv
   _atom_site_type_symbol
   O1         1.0     0.385667      0.997474      0.314353     Biso  1.000000 O
   O2         1.0     0.618122     -0.006469      0.313524     Biso  1.000000 O
   O3         1.0     0.611466      0.997159      0.690880     Biso  1.000000 O
   O4         1.0     0.378566      0.007442      0.696427     Biso  1.000000 O
   O5         1.0     0.749506     -0.000843      0.505316     Biso  1.000000 O
   O6         1.0     0.249020      0.004223      0.501795     Biso  1.000000 O
   O7         1.0     0.499992      0.489897      0.247312     Biso  1.000000 O
   O8         1.0     0.502207      0.508973      0.749229     Biso  1.000000 O
   O9         1.0     0.693896      0.489259      0.378127     Biso  1.000000 O
   O10        1.0     0.310750      0.496900      0.385154     Biso  1.000000 O
   O11        1.0     0.310196      0.507581      0.617085     Biso  1.000000 O
   O12        1.0     0.690575      0.509105      0.610497     Biso  1.000000 O
   O13        1.0     0.683610      0.166739      0.171341     Biso  1.000000 O
   O14        1.0     0.322348      0.177015      0.178593     Biso  1.000000 O
   O15        1.0     0.311540      0.198871      0.808326     Biso  1.000000 O
   O16        1.0     0.685001      0.187317      0.805870     Biso  1.000000 O
   O17        1.0     0.114401      0.192496      0.487710     Biso  1.000000 O
   O18        1.0     0.879972      0.190602      0.491781     Biso  1.000000 O
   O19        1.0     0.117961      0.812043      0.512243     Biso  1.000000 O
   O20        1.0     0.884379      0.812660      0.508241     Biso  1.000000 O
   O21        1.0     0.690490      0.806682      0.193149     Biso  1.000000 O
   O22        1.0     0.316758      0.811332      0.194484     Biso  1.000000 O
   O23        1.0     0.320831      0.828463      0.832590     Biso  1.000000 O
   O24        1.0     0.679347      0.820308      0.824778     Biso  1.000000 O
   O25        1.0     0.813270      0.686328      0.691053     Biso  1.000000 O
   O26        1.0     0.187535      0.691859      0.700811     Biso  1.000000 O
   O27        1.0     0.181264      0.680109      0.330585     Biso  1.000000 O
   O28        1.0     0.825138      0.675346      0.330726     Biso  1.000000 O
   O29        1.0     0.498282      0.692698      0.890600     Biso  1.000000 O
   O30        1.0     0.501552      0.685374      0.123031     Biso  1.000000 O
   O31        1.0     0.502764      0.314465      0.877691     Biso  1.000000 O
   O32        1.0     0.505155      0.301781      0.111001     Biso  1.000000 O
   O33        1.0     0.814676      0.323260      0.673105     Biso  1.000000 O
   O34        1.0     0.177101      0.326169      0.668394     Biso  1.000000 O
   O35        1.0     0.185457      0.314473      0.303942     Biso  1.000000 O
   O36        1.0     0.811993      0.305844      0.300728     Biso  1.000000 O
   O37        1.0     0.811786      0.110619      0.984690     Biso  1.000000 O
   O38        1.0     0.192900      0.119562     -0.005162     Biso  1.000000 O
   O39        1.0     0.997282      0.387317      0.799959     Biso  1.000000 O
   O40        1.0    -0.002108      0.381190      0.178715     Biso  1.000000 O
   O41        1.0    -0.000220      0.619723      0.818137     Biso  1.000000 O
   O42        1.0     1.003436      0.613057      0.197873     Biso  1.000000 O
   O43        1.0     0.188464      0.886441      0.014627     Biso  1.000000 O
   O44        1.0     0.808249      0.878957      0.008597     Biso  1.000000 O
   O45        1.0    -0.001136      0.248384      0.988564     Biso  1.000000 O
   O46        1.0     1.001691      0.749164      0.010788     Biso  1.000000 O
   H1         1.0     0.471254      0.996793      0.320435     Biso  1.000000 H
   H2         1.0     0.300943      0.003512      0.433521     Biso  1.000000 H
   H3         1.0     0.349826      0.112528      0.228016     Biso  1.000000 H
   H4         1.0     0.364574      0.926988      0.269930     Biso  1.000000 H
   H5         1.0     0.665212     -0.001717      0.384956     Biso  1.000000 H
   H6         1.0     0.643387      0.057976      0.262831     Biso  1.000000 H
   H7         1.0     0.662080      0.872324      0.240358     Biso  1.000000 H
   H8         1.0     0.525722      0.999296      0.686854     Biso  1.000000 H
   H9         1.0     0.697672      0.995170      0.573612     Biso  1.000000 H
   H10        1.0     0.653519      0.120022      0.763077     Biso  1.000000 H
   H11        1.0     0.632144      0.931751      0.742494     Biso  1.000000 H
   H12        1.0     0.332655      0.005333      0.624186     Biso  1.000000 H
   H13        1.0     0.355859      0.080429      0.735852     Biso  1.000000 H
   H14        1.0     0.340517      0.897228      0.784918     Biso  1.000000 H
   H15        1.0     0.833764      0.118765      0.499544     Biso  1.000000 H
   H16        1.0     0.800219      0.929751      0.507607     Biso  1.000000 H
   H17        1.0     0.198629      0.073313      0.494594     Biso  1.000000 H
   H18        1.0     0.165182      0.883489      0.508052     Biso  1.000000 H
   H19        1.0     0.621453      0.490967      0.332333     Biso  1.000000 H
   H20        1.0     0.431389      0.488632      0.298425     Biso  1.000000 H
   H21        1.0     0.501976      0.611580      0.166658     Biso  1.000000 H
   H22        1.0     0.498681      0.419270      0.198574     Biso  1.000000 H
   H23        1.0     0.381796      0.504469      0.664128     Biso  1.000000 H
   H24        1.0     0.570433      0.512210      0.697742     Biso  1.000000 H
   H25        1.0     0.503740      0.577866      0.800364     Biso  1.000000 H
   H26        1.0     0.503763      0.387238      0.832639     Biso  1.000000 H
   H27        1.0     0.685758      0.506717      0.525012     Biso  1.000000 H
   H28        1.0     0.777136      0.606260      0.347616     Biso  1.000000 H
   H29        1.0     0.736835      0.419916      0.350752     Biso  1.000000 H
   H30        1.0     0.318704      0.498841      0.470581     Biso  1.000000 H
   H31        1.0     0.262984      0.565776      0.366125     Biso  1.000000 H
   H32        1.0     0.231848      0.379657      0.334034     Biso  1.000000 H
   H33        1.0     0.234529      0.626990      0.670974     Biso  1.000000 H
   H34        1.0     0.263287      0.438801      0.638068     Biso  1.000000 H
   H35        1.0     0.736801      0.578154      0.633265     Biso  1.000000 H
   H36        1.0     0.766557      0.390466      0.649923     Biso  1.000000 H
   H37        1.0     0.574421      0.254239      0.129303     Biso  1.000000 H
   H38        1.0     0.733215      0.218851      0.218829     Biso  1.000000 H
   H39        1.0     0.732021      0.145644      0.103687     Biso  1.000000 H
   H40        1.0     0.391499      0.221520      0.153441     Biso  1.000000 H
   H41        1.0     0.238727      0.265808      0.257301     Biso  1.000000 H
   H42        1.0     0.239542      0.141699      0.063396     Biso  1.000000 H
   H43        1.0     0.431813      0.273202      0.852643     Biso  1.000000 H
   H44        1.0     0.258604      0.244624      0.758873     Biso  1.000000 H
   H45        1.0     0.266074      0.170794      0.875098     Biso  1.000000 H
   H46        1.0     0.616916      0.232281      0.833058     Biso  1.000000 H
   H47        1.0     0.764217      0.273285      0.721947     Biso  1.000000 H
   H48        1.0     0.765318      0.138876      0.918196     Biso  1.000000 H
   H49        1.0     0.029103      0.185288      0.487818     Biso  1.000000 H
   H50        1.0     0.150468      0.276754      0.603454     Biso  1.000000 H
   H51        1.0     0.135346      0.237500      0.417531     Biso  1.000000 H
   H52        1.0     0.857211      0.239768      0.558244     Biso  1.000000 H
   H53        1.0     0.840701      0.262639      0.369103     Biso  1.000000 H
   H54        1.0     0.969840      0.819196      0.509717     Biso  1.000000 H
   H55        1.0     0.143923      0.770104      0.582525     Biso  1.000000 H
   H56        1.0     0.153645      0.728447      0.396101     Biso  1.000000 H
   H57        1.0     0.842112      0.735426      0.626871     Biso  1.000000 H
   H58        1.0     0.865680      0.762052      0.441541     Biso  1.000000 H
   H59        1.0     0.740179      0.759769      0.244848     Biso  1.000000 H
   H60        1.0     0.571101      0.728454      0.148885     Biso  1.000000 H
   H61        1.0     0.764316      0.858245      0.079692     Biso  1.000000 H
   H62        1.0     0.268218      0.760965      0.244054     Biso  1.000000 H
   H63        1.0     0.383306      0.763963      0.168036     Biso  1.000000 H
   H64        1.0     0.234205      0.858033      0.081493     Biso  1.000000 H
   H65        1.0     0.239456      0.739740      0.749421     Biso  1.000000 H
   H66        1.0     0.430441      0.742233      0.872680     Biso  1.000000 H
   H67        1.0     0.271555      0.853667      0.898185     Biso  1.000000 H
   H68        1.0     0.764141      0.736982      0.740077     Biso  1.000000 H
   H69        1.0     0.614027      0.772283      0.853391     Biso  1.000000 H
   H70        1.0     0.726634      0.840646      0.893655     Biso  1.000000 H
   H71        1.0     0.932848      0.645735      0.771219     Biso  1.000000 H
   H72        1.0     0.069220      0.645310      0.774333     Biso  1.000000 H
   H73        1.0     0.113360      0.657801      0.283067     Biso  1.000000 H
   H74        1.0     0.889920      0.649385      0.280652     Biso  1.000000 H
   H75        1.0     0.499119      0.682929      0.975902     Biso  1.000000 H
   H76        1.0     0.504858      0.313021      0.025994     Biso  1.000000 H
   H77        1.0     0.926887      0.366873      0.755051     Biso  1.000000 H
   H78        1.0     0.107832      0.347907      0.714427     Biso  1.000000 H
   H79        1.0     0.067123      0.356996      0.223025     Biso  1.000000 H
   H80        1.0     0.881423      0.332387      0.257722     Biso  1.000000 H
   H81        1.0     0.814591      0.964113      0.004127     Biso  1.000000 H
   H82        1.0     0.882080      0.160040      0.986618     Biso  1.000000 H
   H83        1.0     0.184143      0.034754      0.001038     Biso  1.000000 H
   H84        1.0     0.070307      0.201057      0.989006     Biso  1.000000 H
   H85        1.0     0.996640      0.472727      0.809325     Biso  1.000000 H
   H86        1.0     0.001536      0.298216      0.919084     Biso  1.000000 H
   H87        1.0     0.001925      0.529425      0.179335     Biso  1.000000 H
   H88        1.0    -0.000610      0.334418      0.106647     Biso  1.000000 H
   H89        1.0     1.000043      0.702165      0.938860     Biso  1.000000 H
   H90        1.0     1.001654      0.658672      0.124900     Biso  1.000000 H
   H91        1.0     0.118372      0.836558      0.011741     Biso  1.000000 H
   H92        1.0     0.930994      0.797592      1.008810     Biso  1.000000 H
   C1         1.0     0.497567      0.000354      0.003193     Biso  1.000000 C
   O47        1.0     0.485008      0.065050     -0.072584     Biso  1.000000 O
   O48        1.0     0.510328      0.935765      0.079045     Biso  1.000000 O
   C2         1.0     0.002703      0.503706      0.496948     Biso  1.000000 C
   O49        1.0     0.013743      0.579750      0.561589     Biso  1.000000 O
   O50        1.0    -0.008530      0.427538      0.432409     Biso  1.000000 O
   C3         1.0     0.000548     -0.011716      0.237851     Biso  1.000000 C
   O51        1.0    -0.004444      0.086688      0.217485     Biso  1.000000 O
   O52        1.0     0.005398      0.889980      0.258637     Biso  1.000000 O
   C4         1.0     0.487225      0.746272      0.494185     Biso  1.000000 C
   O53        1.0     0.421806      0.773737      0.565496     Biso  1.000000 O
   O54        1.0     0.552813      0.718754      0.423022     Biso  1.000000 O
   C5         1.0    -0.008806      0.008576      0.756418     Biso  1.000000 C
   O55        1.0     0.018537      0.103870      0.739287     Biso  1.000000 O
   O56        1.0    -0.035906      0.913185      0.773324     Biso  1.000000 O
   C6         1.0     0.506226      0.256862      0.494325     Biso  1.000000 C
   O57        1.0     0.498958      0.267010      0.594144     Biso  1.000000 O
   O58        1.0     0.513150      0.246515      0.394481     Biso  1.000000 O
   C7         1.0     0.245279      0.497343      0.006088     Biso  1.000000 C
   O59        1.0     0.239096      0.597040     -0.005856     Biso  1.000000 O
   O60        1.0     0.251503      0.397638      0.017995     Biso  1.000000 O
   C8         1.0     0.757890      0.495975     -0.004946     Biso  1.000000 C
   O61        1.0     0.756296      0.596493     -0.009116     Biso  1.000000 O
   O62        1.0     0.759414      0.395480     -0.000836     Biso  1.000000 O
